# Supplementary material
Source: publisher figshare collection journal article supplement (https://tandf.figshare.com/articles/dataset/_/6143645)
Supplement: Supplementary file 2 [file 1]

Central

Solar Potential of Rooftops in Cáceres City

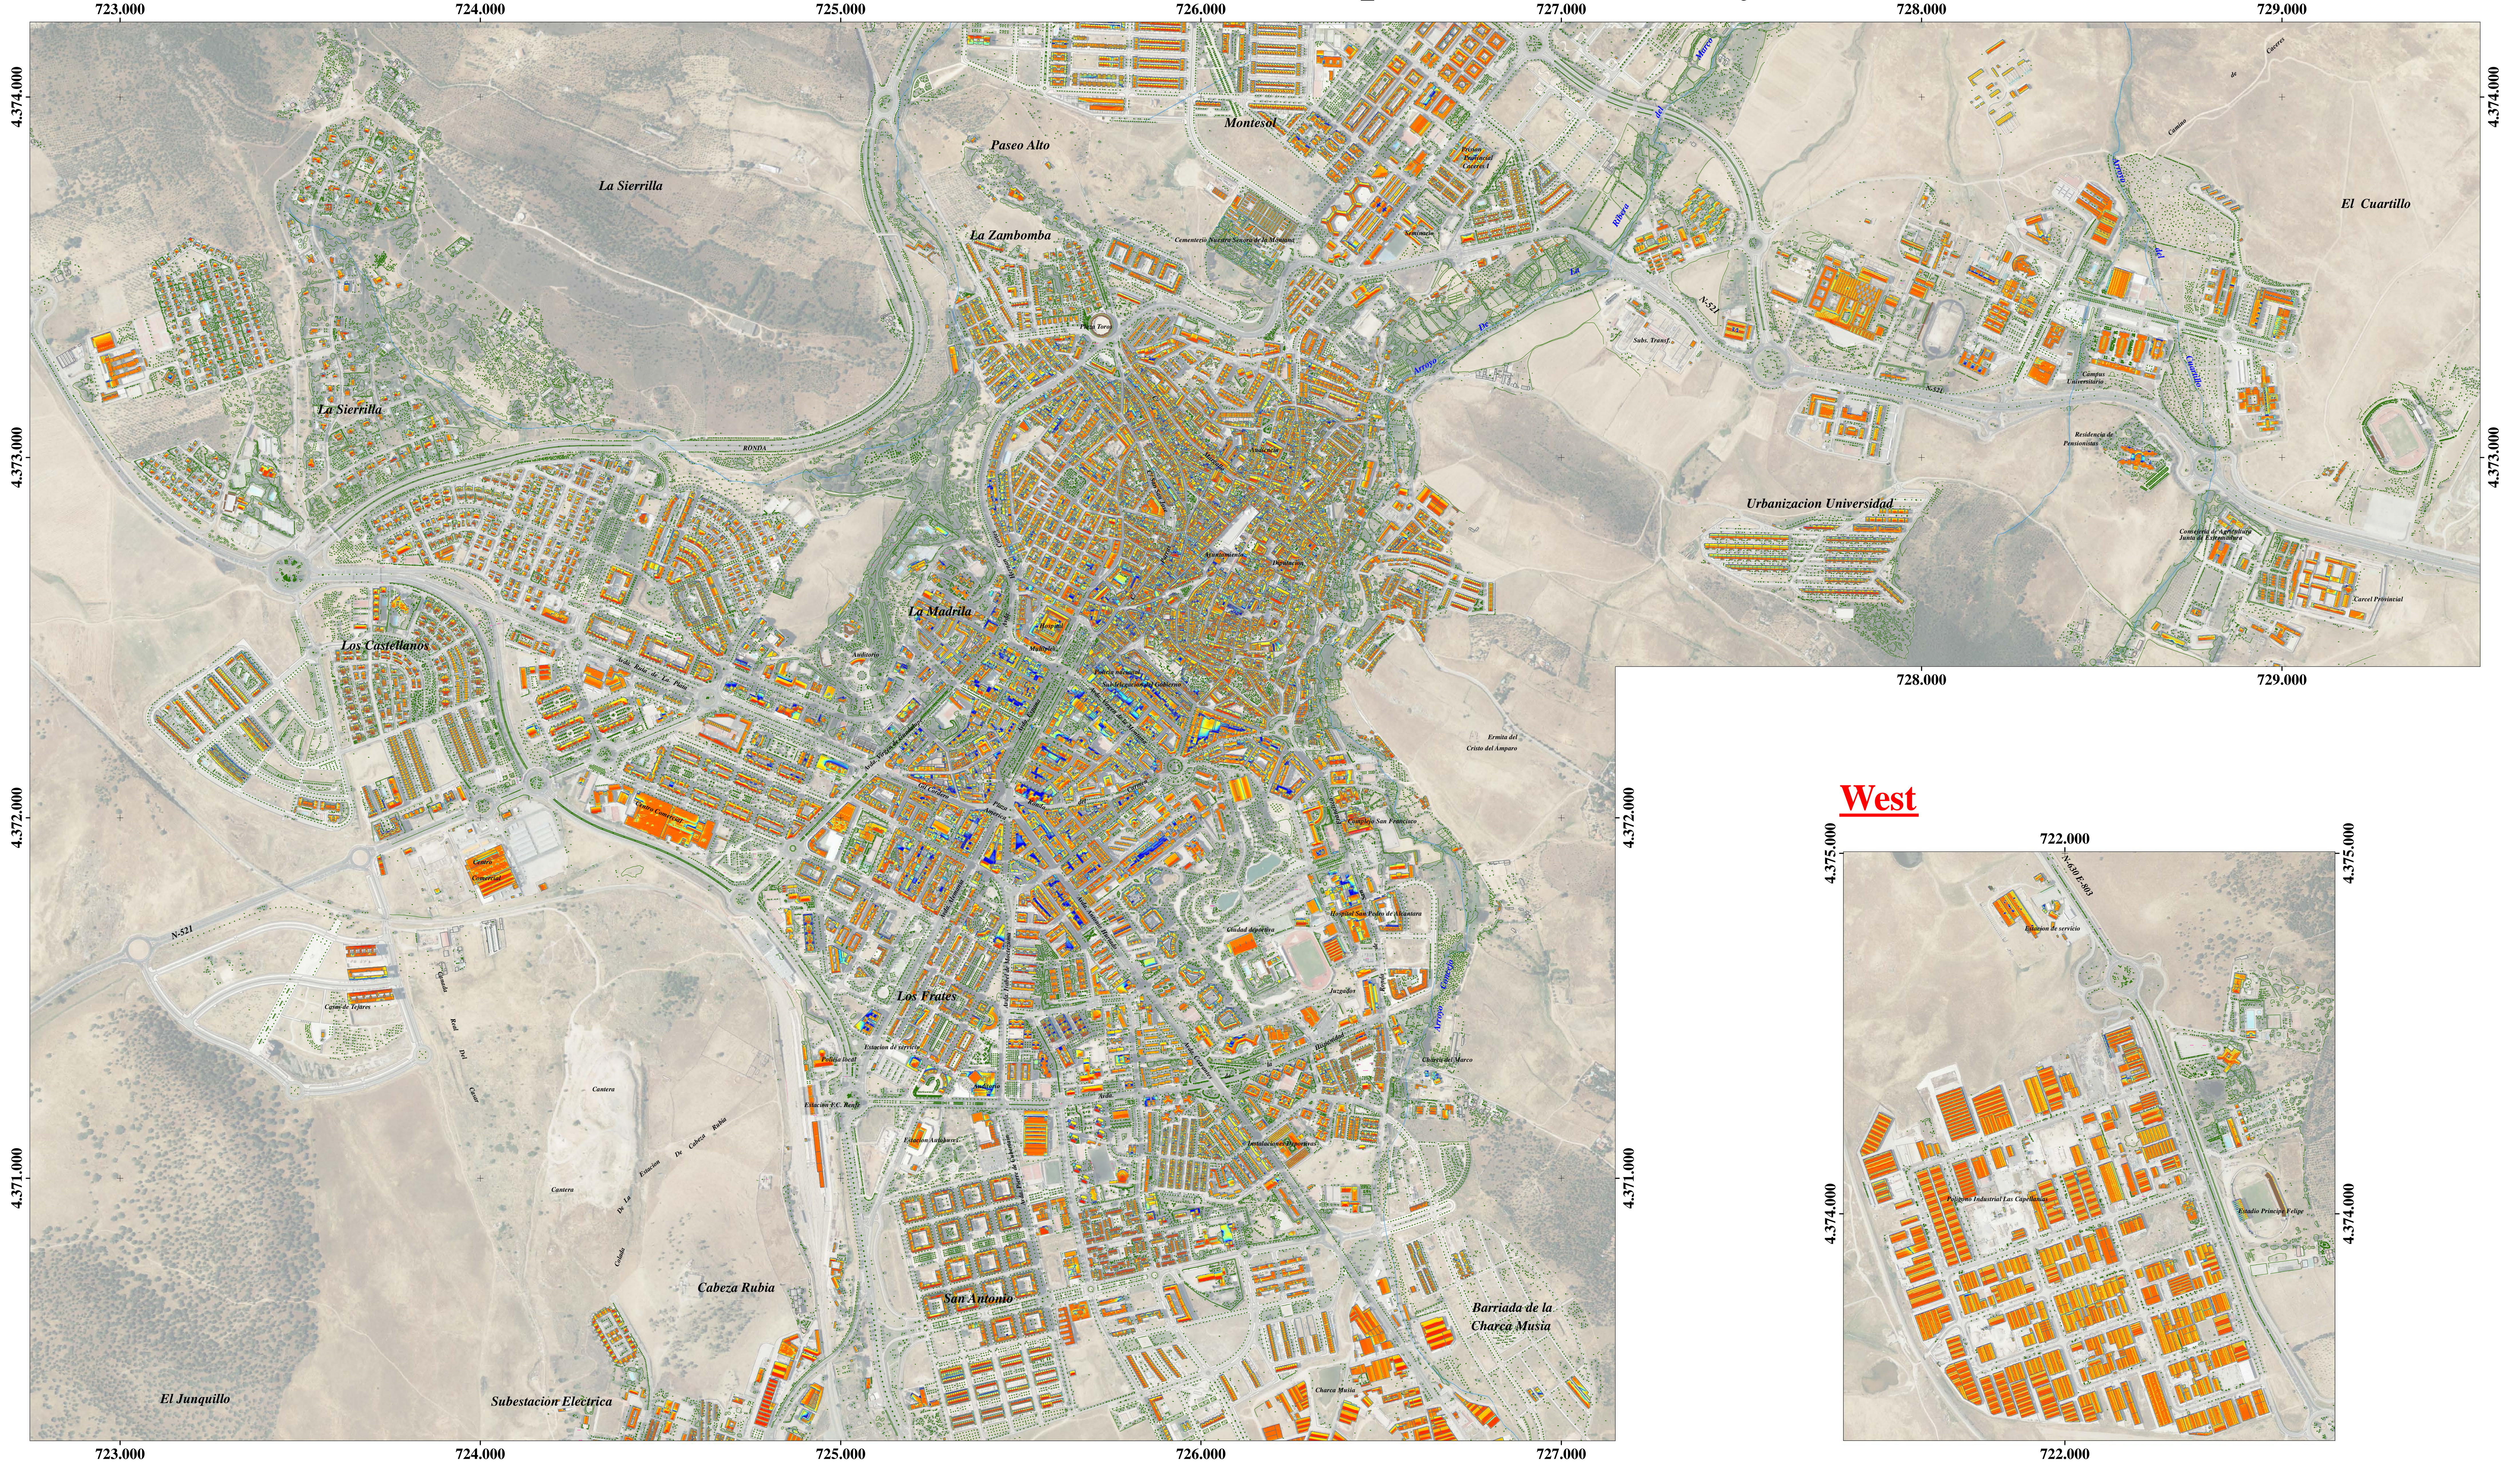

West

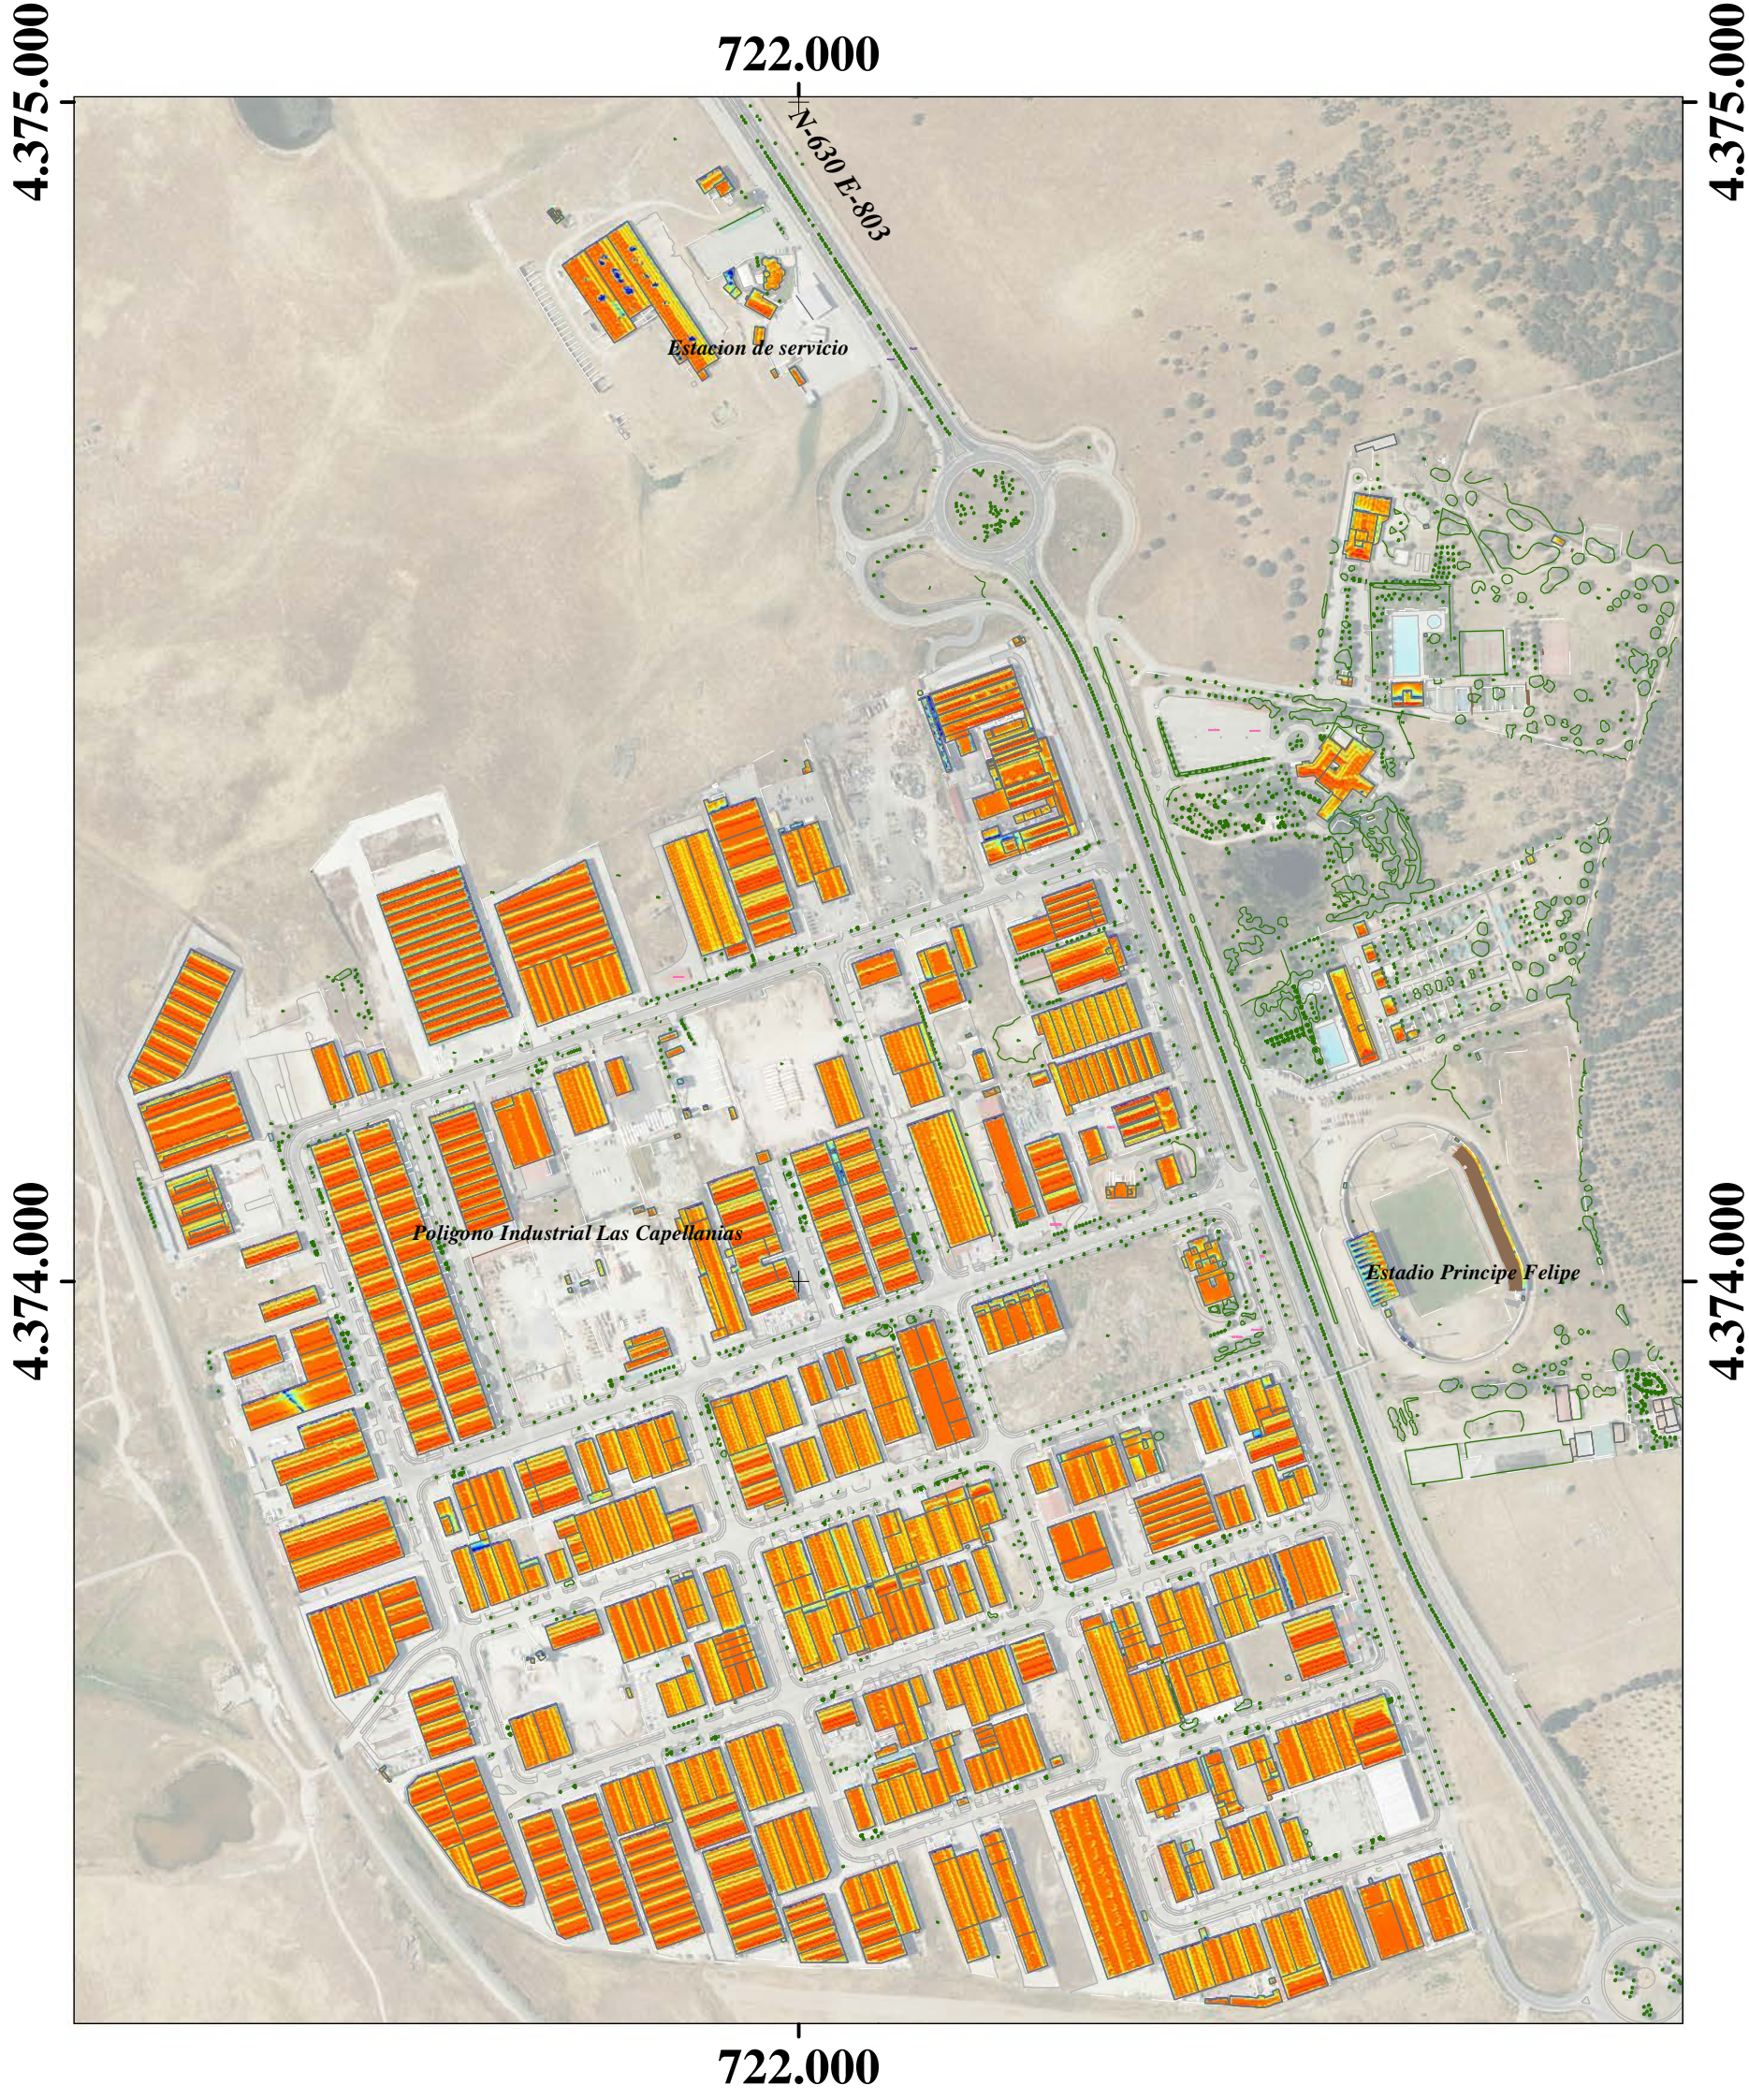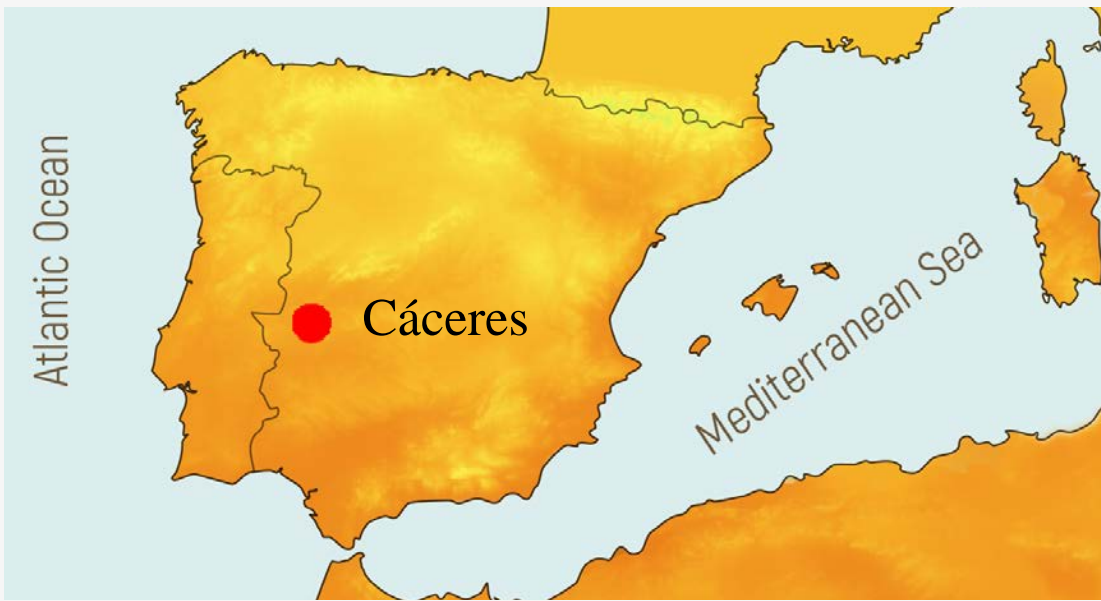

The studied area is located in western Spain. It is a small city of 36 km<sup>2</sup> with a population of around 100,000. It has a Mediterranean climate with smooth winters and warm summers, in which the average maximum temperature is 34°C. Rainfall is abundant in the months of October, November, March, April and May, but very intermittent.

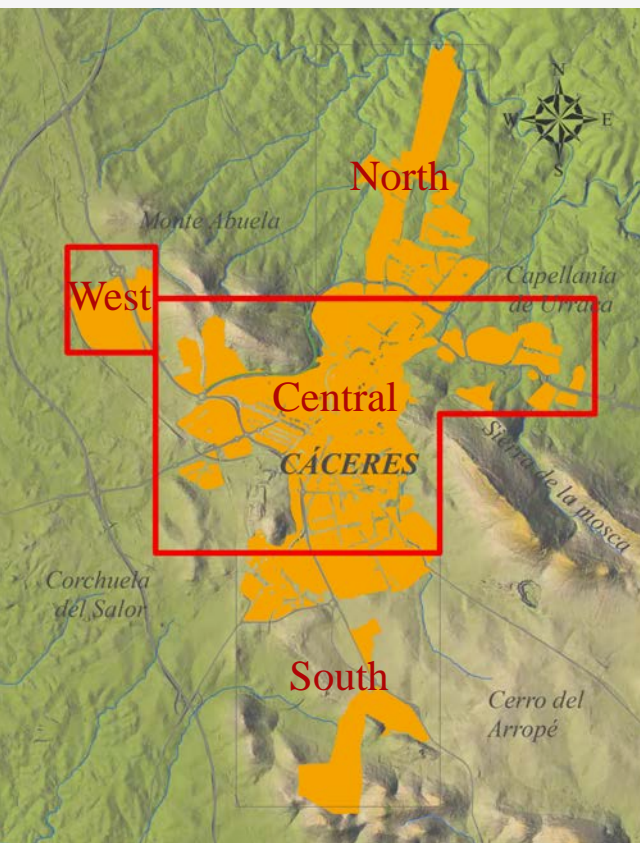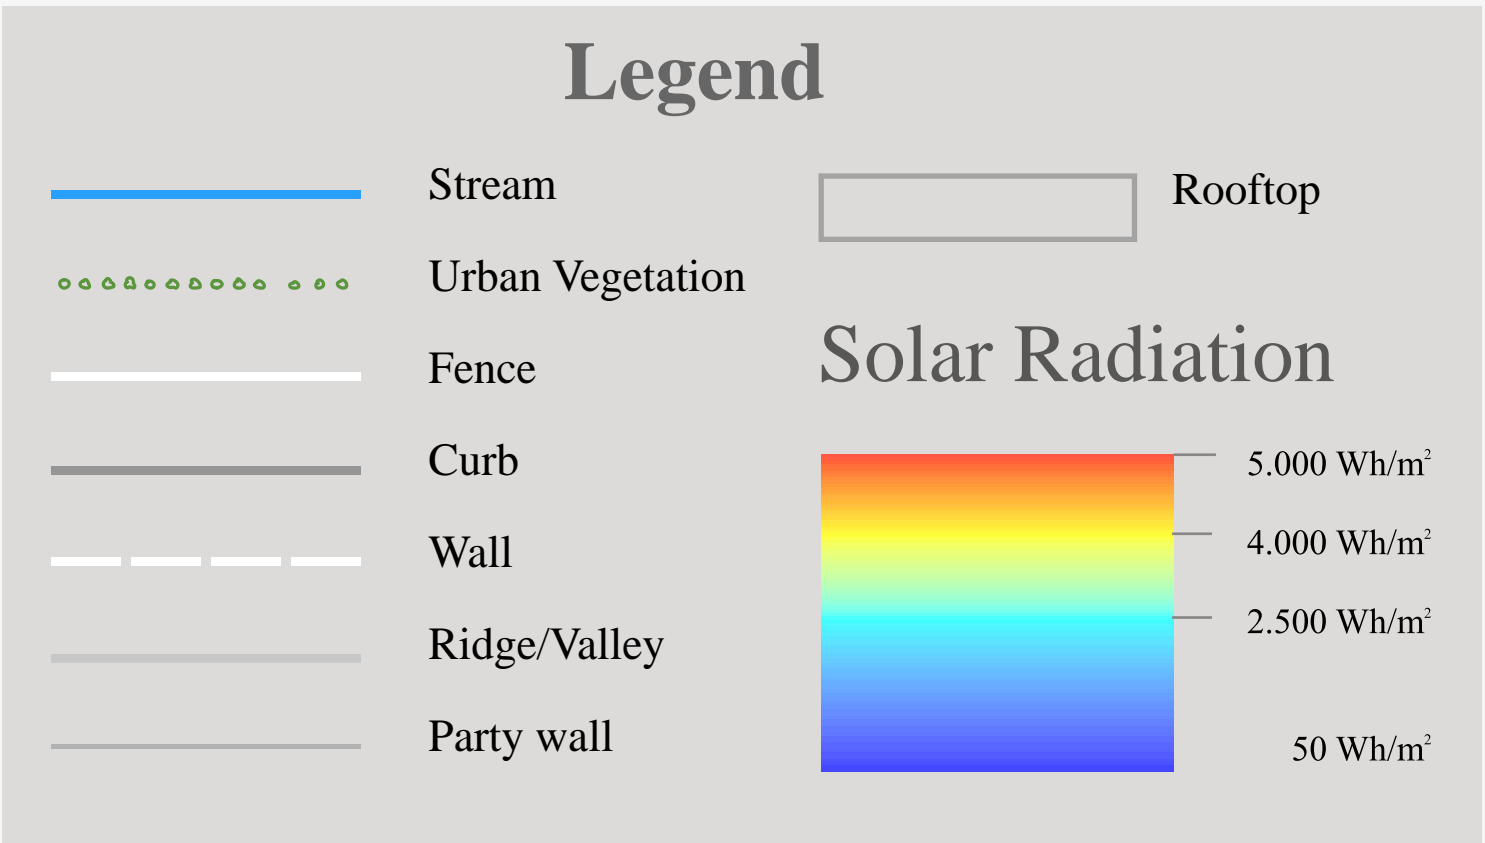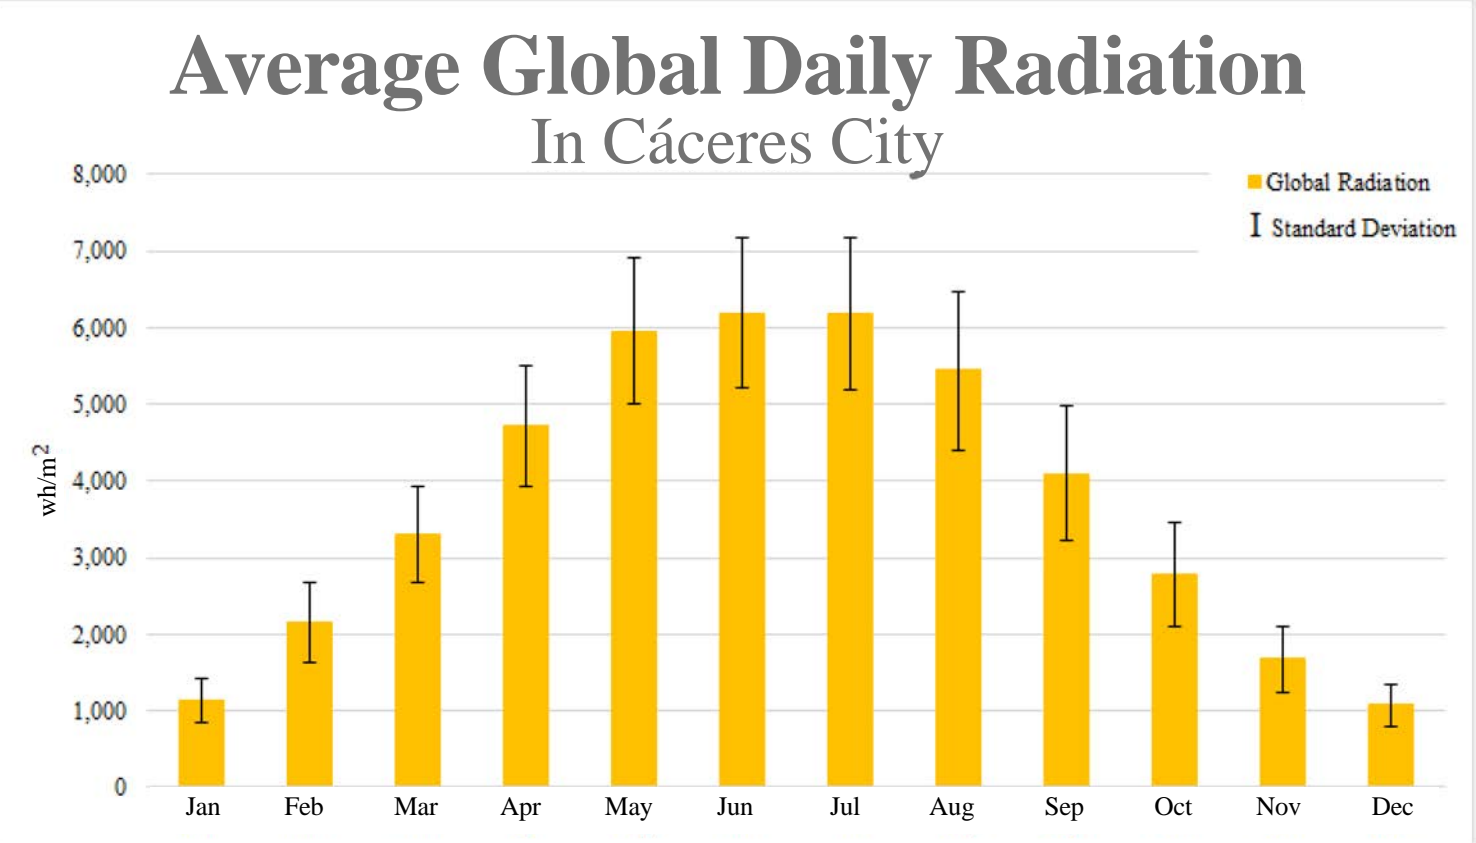

**Coordinate System:**  
ETRS 1989 UTM Zone 29N  
**Projection:** Transverse Mercator  
**False Easting:** 500,000,000  
**Central Meridian:** -9,0000  
**Latitude of Origin:** 0,0000  
**False Northing:** 0,0000  
**Scale Factor:** 0,9996  
**Datum:** ETRS1989  
**Units:** Meter

0,5 0,25 0 0,5 1 Km

**Elia Quirós\*, Mar Pozo and José Ceballos**  
Polytechnic School, University of Extremadura, Cáceres, Spain  
\* equiros@unex.es
